# Supplementary material for: Rapid and inducible mislocalization of endogenous TDP43 in a novel human model of amyotrophic lateral sclerosis
Source: eLife journal article supplement (doi:10.7554/elife.95062), 2024-02-26
Supplement: fig3-data1 [file elife-95062-fig3-data1-v1.zip]

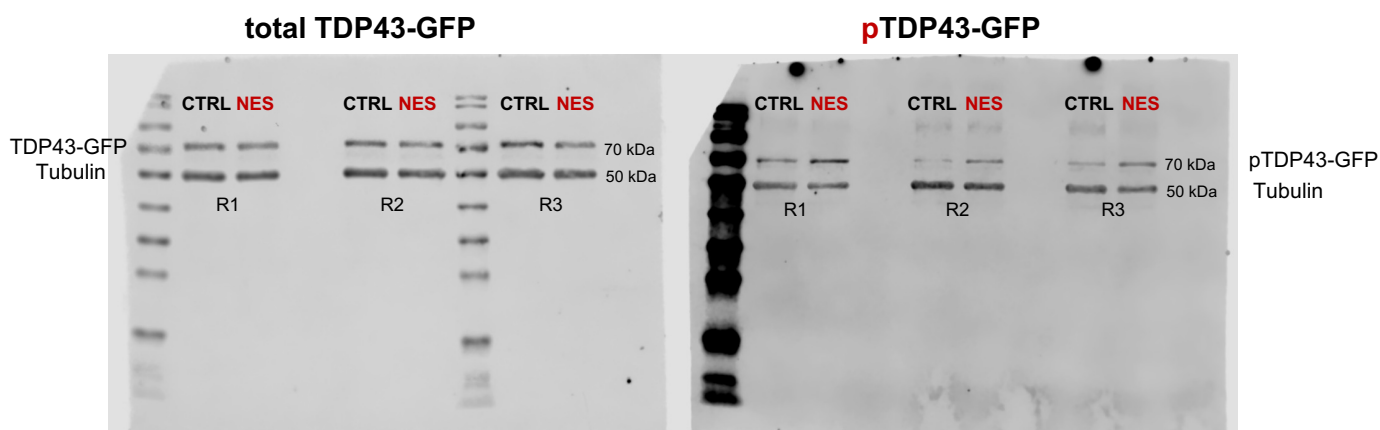

**Figure 3 – Source Data 1. Uncropped Western Blots as seen in Figure 3D (and Figure 3-supplement 2) showing blots for total TDP43 and phosphorylated TDP43 (pTDP43) for control TDP43-GFP-CTRL and –NES lines. MN samples were collected at day 40, 20 days post-Dox addition. Alpha-tubulin (50 kDa) was used as a loading control.**
